# Supplementary material for: The histone variant H2A.Bbd is enriched at sites of DNA synthesis
Source: PubMed Central journal article supplement — Nucleic Acids Res. 2014 Apr 20;42(10):6405–20. doi: 10.1093/nar/gku303 (PMC4041467; doi:10.1093/nar/gku303), 2014-04-20
Supplement: supp_gku303_nar-00514-x-2014-File012.pdf [file supp_gku303_nar-00514-x-2014-File012.pdf]

## Supplementary Material

### **Supplementary Figure S1: Identified proteins overlap among the replicates.**

Protein factors identified after the GFP-H2A variants chromatin purification using the GFP nanotrap beads are displayed in Venn diagrams showing the identified proteins overlap in three independent biological replicates (e.g. H2A.Bbd exp.#1, #2 and #3).

### **Supplementary Figure S2: GFP-H2A.Bbd co-localizes with DNA-dense regions**

**in a subpopulation of cells.** Single confocal slice of asynchronous population of female MEF cells that express GFP-H2A.Bbd. To-PRO: DNA (blue); GFP: GFP-H2A.Bbd (green). The arrow indicates GFP-H2A.Bbd co-localizing with DNA dense regions. The two panels represent different areas of acquisition. Scale bar upper panel: 5  $\mu\text{m}$ ; lower panel: 10  $\mu\text{m}$ .

### **Supplementary Figure S3: GFP-H2A.Bbd localizes to sites of replication during**

**all stages of S-phase.** Single confocal slice of female MEFs expressing H2A.Bbd labeled with EdU and stained with anti-GFP at different time of replication. EdU: replication foci (red); GFP-H2A.Bbd: GFP (green); DAPI: DNA (blue). Early S-phase: eS; late S-phase: lS. Scale bar: 5  $\mu\text{m}$ .

### **Supplementary Figure S4: GFP-H2A.Bbd has different resident time in early-**

**and late- replicating chromatin.** Optical sections of confocal images of replicating MEF cells stably expressing GFP-H2A.Bbd and pulsed labeled with BrdU (red) for 5 min and fixed 0 / 5 / 10 min thereafter as indicated. Scale bars: 5  $\mu\text{m}$ .

### **Supplementary Movie. Localization of H2A.Bbd to sites of DNA synthesis *in***

***vivo*.** Live cell imaging of MEF cells stably expressing GFP-H2A.Bbd (green) transfected with mRFP-PCNA (red). 3D-stacks were acquired at 20-minute intervals

over night using a spinning disk microscope equipped with temperature, humidity and CO<sub>2</sub> control. Shown are maximum intensity projections of each time point. Scale bar: 5 μm.

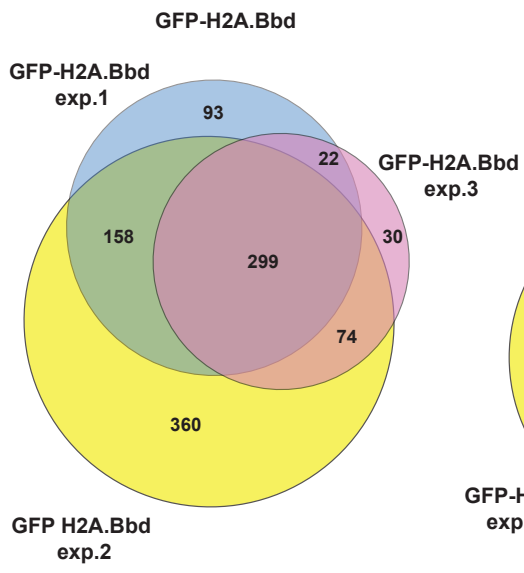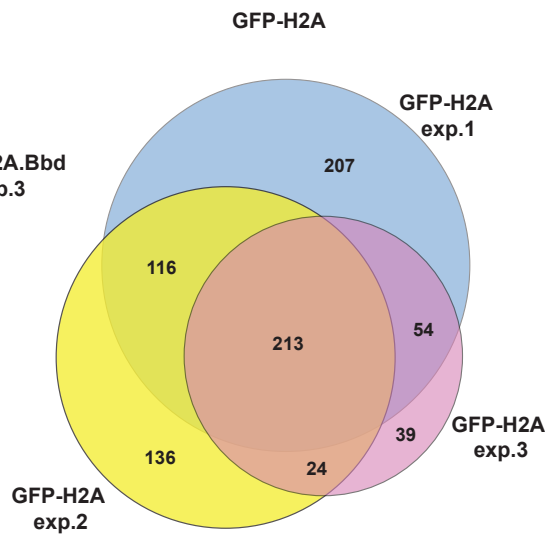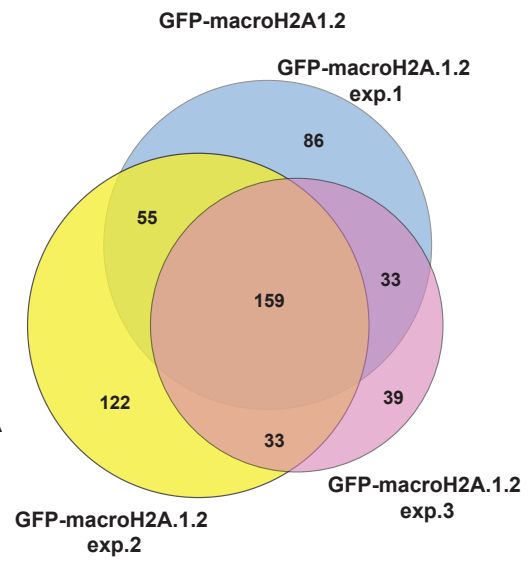

*Supplementary figure S1, Sansoni et al.*

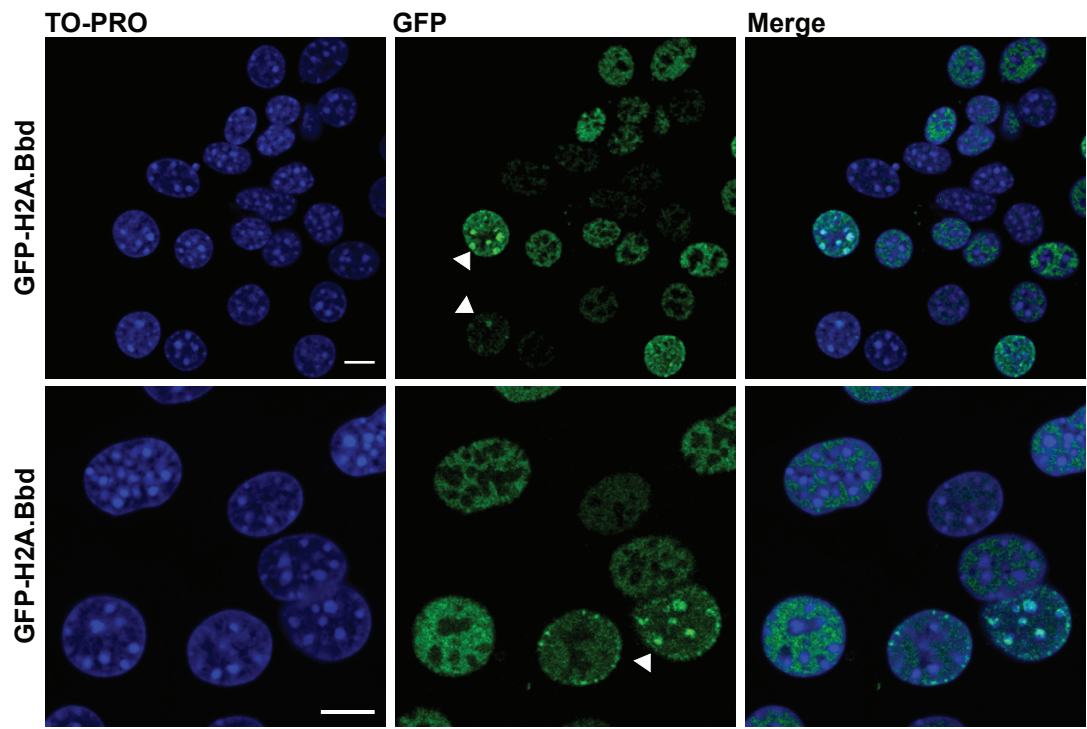

Supplementary figure S2, Sansoni et al.



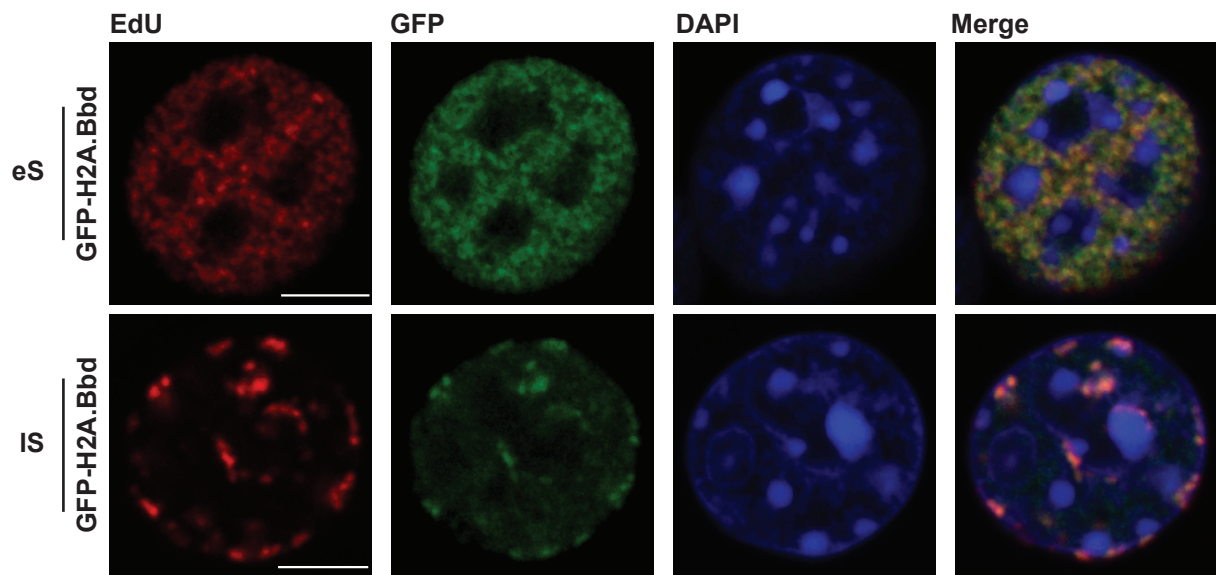

Supplementary figure S4, Sansoni et al.

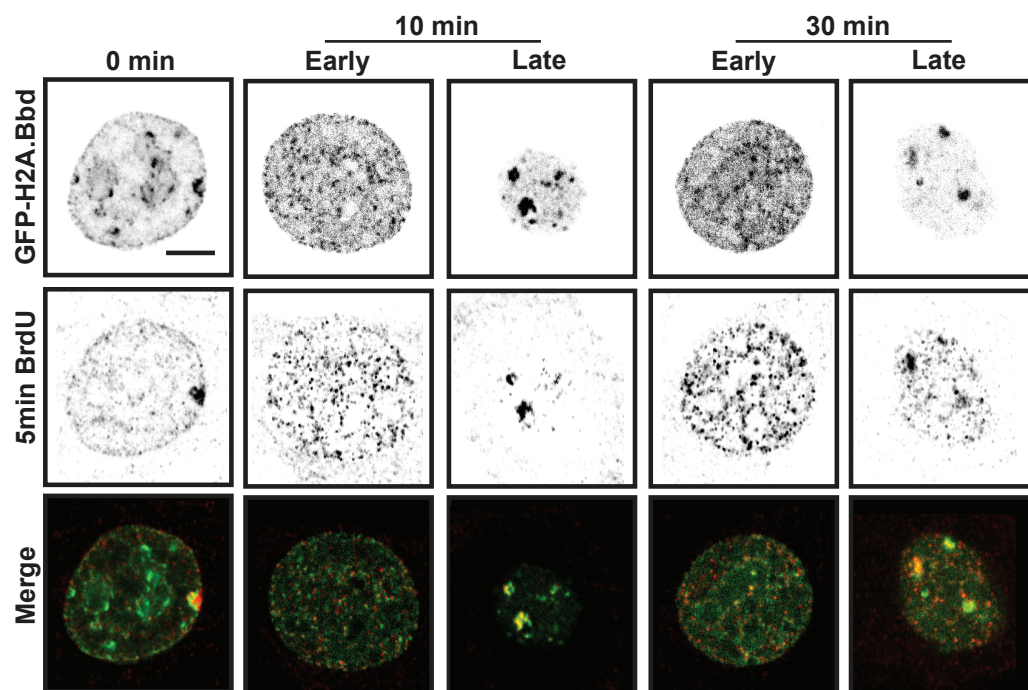

Supplementary figure S4, Sansoni et al.
